# Supplementary material for: Palladium( ii )/Lewis acid catalyzed oxidative olefination of 2-benzamidopyridine 1-oxide with acrylates: synthesis of isoindolinones
Source: Royal Society of Chemistry journal article supplement (doi:10.1039/d5ob00021a), 2025-01-01
Supplement: d5ob00021a1.xlsx [file d5ob00021a1.xlsx]

## Sheet: Sheet1
Characterisation Checklist
Manuscript ID:
Submitting Author:	Subhash Chandra Ghosh
Manuscrtipt Title:	Palladium (II)/Lewis Acid Catalyzed Oxidative Olefination of 2-Benzamidopyridine 1-Oxide with Acrylates: Synthesis of Isoindolinones
1. For each compound, type a single 'X" in the cell corresponding to the type data reported in the manuscript or ESI. 2. Save the completed checklist as a ".xls" or ".xlsx" file, even on a non-Windows computer. During submission, upload the saved file together with your manuscript, and select “Characterization Checklist” as the file designation.
Compounds (structure or number)	New	Known with reference(s) cited	Yield	Physucak state / mp if cryst. Colid	IR	UV-Vis	1H NMR	13C NMR	2D NMR	Copy of NMR spectrum in ESI	MS	HRMS	Elemental Analysis	Specific optical rotation	GC/ HPLC	Copy of chromatogram in ESI	X-ray (ORTEP and CIF in ESI)	Notes
3a	X		0.76				X	X		X		X
3b	X		0.7				X	X		X		X
3c	X		0.61				X	X		X		X
3f	X		0.58				X	X		X		X
3g	X		0.54				X	X		X		X
3h	X		0.79				X	X		X		X
3i	X		0.7				X	X		X		X
3j	X		0.69				X	X		X		X
3k	X		0.6				X	X		X		X
3l	X		0.51				X	X		X		X
3n	X		0.66				X	X		X		X
3o	X		0.62				X	X		X		X
3p	X		0.72	X			X	X		X		X					X
3q	X		0.71	X			X	X		X		X
3t	X		0.71				X	X		X		X
3u	X		0.69				X	X		X		X
3v	X		0.68				X	X		X		X
3w	X		0.74	X			X	X		X		X					X
3x	X		0.71				X	X		X		X
3y	X		0.71	X			X	X		X		X
3z	X		0.68				X	X		X		X
3aa	X		0.77				X	X		X		X
3ab	X		0.68	X			X	X		X		X
3ac	X		0.72	X			X	X		X		X
3ad	X		0.74	X			X	X		X		X
5		X	0.9	X			X	X		X		X
4	X		0.66				X	X		X		X
7		X	0.76	X			X	X		X		X
